# Supplementary material for: Responsive Feeding Practices to Promote Healthy Diets: A Mixed Method Study among Low-Income Caregivers with Toddlers
Source: MDPI journal article supplement (doi:10.3390/nu16060863), 2024-03-16
Supplement: s1 [file s1]

## Supplemental Tables

### **Responsive Feeding Conceptual Groups**

Questions about responsive feeding (n=25) were placed into conceptual groups. Each question was scored 0-4, with greater scores indicating greater alignment with responsive feeding. Questions within each conceptual group were averaged, and thus, each conceptual group is also scored 0-4, with greater scores indicating alignment with responsive feeding.

**Table S1.** Scoring of responsive feeding questions and conceptual groups.

| <b>Environmental Influences Score</b>                                                        |                                                                                                        |
|----------------------------------------------------------------------------------------------|--------------------------------------------------------------------------------------------------------|
| <b>Question</b>                                                                              | <b>Scale (Numerical Value)</b>                                                                         |
| <b>Meal Environment (0-4)</b>                                                                |                                                                                                        |
| My child ate with the rest of the family<br>I enjoy spending time with my child at mealtimes | Never in the past 7 days (0)<br>1 or 2 days (1)<br>3 or 4 days (2)<br>5 or 6 days (3)<br>Every day (4) |
| My child ate at the table or in a high chair                                                 | Never in the past 7 days (0)<br>1 or 2 days (1)<br>3 or 4 days (2)<br>5 or 6 days (3)<br>Every day (4) |
| My child ate while watching TV                                                               | Never in the past 7 days (4)<br>1 or 2 days (3)<br>3 or 4 days (2)<br>5 or 6 days (1)<br>Every day (0) |
| My child ate on the go, such as in a stroller or car seat, or on the bus                     | Never in the past 7 days (4)<br>1 or 2 days (3)<br>3 or 4 days (2)<br>5 or 6 days (1)<br>Every day (0) |
| I enjoy spending time with my child at mealtimes                                             | Never in the past 7 days (0)<br>1 or 2 days (1)<br>3 or 4 days (2)<br>5 or 6 days (3)<br>Every day (4) |
| <b>Food offered and caregiver modeling (0-4)</b>                                             |                                                                                                        |
| Other people in my family make it hard for me to feed my child healthy                       | Disagree strongly (4)<br>Disagree (3)<br>Neutral (2)<br>Agree (1)<br>Agree Strongly (0)                |
| The food we eat as a family provides enough nutrition for my child                           | Disagree strongly (0)<br>Disagree (1)<br>Neutral (2)                                                   |

|                                                                                                              |                                                                                                                                                             |
|--------------------------------------------------------------------------------------------------------------|-------------------------------------------------------------------------------------------------------------------------------------------------------------|
|                                                                                                              | Agree (3)<br>Agree Strongly (4)                                                                                                                             |
| <b>Parent Nutrition Beliefs (0-4)</b>                                                                        |                                                                                                                                                             |
| Picky eaters need products like Pediasure, Enfagrow, or Nido to get enough nutrition                         | Disagree strongly (4)<br>Disagree (3)<br>Neutral (2)<br>Agree (1)<br>Agree Strongly (0)                                                                     |
| Toddler formulas or powdered milks provide nutrition that children don't get from other food and drinks      | Disagree strongly (4)<br>Disagree (3)<br>Neutral (2)<br>Agree (1)<br>Agree Strongly (0)                                                                     |
| Pureed food that comes in pouches is a good way to teach toddlers to like the taste of fruits and vegetables | Disagree strongly (4)<br>Disagree (3)<br>Neutral (2)<br>Agree (1)<br>Agree Strongly (0)                                                                     |
| Children won't eat the same food as the rest of the family. They need their own type of food                 | Disagree strongly (4)<br>Disagree (3)<br>Neutral (2)<br>Agree (1)<br>Agree Strongly (0)                                                                     |
| 100% juice is a good choice if a child won't eat fruit or vegetables                                         | Disagree strongly (4)<br>Disagree (3)<br>Neutral (2)<br>Agree (1)<br>Agree Strongly (0)                                                                     |
| Children should be served fruits and vegetables every day                                                    | Disagree strongly (0)<br>Disagree (1)<br>Neutral (2)<br>Agree (3)<br>Agree Strongly (4)                                                                     |
| <b>Child Influences Score</b>                                                                                |                                                                                                                                                             |
| <b>Child Self-Regulation of Intake (0-4)</b>                                                                 |                                                                                                                                                             |
| [Picture of a meal shown] Is it like the amount of food you serve at a meal for your child?                  | More food than shown in the picture (0)<br>Same amount of food shown in the picture (4)<br>Less food than shown in the picture (2)                          |
| Who decides how much food your child eats?                                                                   | Only me or another adult (0)<br>Mostly me or another adult (1)<br>Me or another adult and my child the same (2)<br>Mostly my child (3)<br>My child only (4) |
| Do you make your child finish all the food you serve?                                                        | Yes (0)<br>Sometimes (2)<br>No (4)                                                                                                                          |
| <b>Child Hunger and Satiety Cues (0-4)</b>                                                                   |                                                                                                                                                             |

|                                                                                                                  |                                                                                                        |
|------------------------------------------------------------------------------------------------------------------|--------------------------------------------------------------------------------------------------------|
| My child tells me when he or she is hungry                                                                       | All the time (4)<br>Most of the time (3)<br>Sometimes (2)<br>Rarely (1)<br>Never (0)                   |
| I worry that my child eats too much                                                                              | Disagree strongly (4)<br>Disagree (3)<br>Neutral (2)<br>Agree (1)<br>Agree Strongly (0)                |
| It is difficult to get my child to eat enough at meals                                                           | Disagree strongly (4)<br>Disagree (3)<br>Neutral (2)<br>Agree (1)<br>Agree Strongly (0)                |
| <b>Food for Reward or Behavior (0-4)</b>                                                                         |                                                                                                        |
| It's OK to give children drinks with added sugar once in a while                                                 | Disagree strongly (4)<br>Disagree (3)<br>Neutral (2)<br>Agree (1)<br>Agree Strongly (0)                |
| It would be mean to not give children sweet treats once in a while                                               | Disagree strongly (4)<br>Disagree (3)<br>Neutral (2)<br>Agree (1)<br>Agree Strongly (0)                |
| In the past 7 days, how many days did you give your child something to eat or drink because he or she was fussy? | Never in the past 7 days (4)<br>1 or 2 days (3)<br>3 or 4 days (2)<br>5 or 6 days (1)<br>Every day (0) |
| <b>Child Food Acceptance (0-4)</b>                                                                               |                                                                                                        |
| My child only eats a few foods                                                                                   | Disagree strongly (4)<br>Disagree (3)<br>Neutral (2)<br>Agree (1)<br>Agree Strongly (0)                |
| My child will not taste a new food                                                                               | Disagree strongly (4)<br>Disagree (3)<br>Neutral (2)<br>Agree (1)<br>Agree Strongly (0)                |
